# Supplementary material for: Association between ACE2 and TMPRSS2 nasopharyngeal expression and COVID-19 respiratory distress
Source: PubMed Central journal article supplement (PMC8102547; doi:10.1038/s41598-021-88944-8), 2021-05-06
Supplement: 41598_2021_88944_MOESM1_ESM.pdf [file 41598_2021_88944_MOESM1_ESM.pdf]

1 **Association between *ACE2* and *TMPRSS2* Nasopharyngeal Expression and COVID-19**  
2 **respiratory distress**

3 Átila Duque Rossi<sup>1</sup>, João Locke Ferreira de Araújo<sup>2</sup>, Tailah Bernardo de Almeida<sup>3</sup>, Marcelo  
4 Ribeiro-Alves<sup>4</sup>, Camila de Almeida Velozo<sup>1</sup>, Jéssica Maciel<sup>1</sup>, Isabela de Carvalho Leitão<sup>5</sup>,  
5 Sâmila Natiane Ferreira<sup>6</sup>, Jéssica da Silva Oliveira<sup>6</sup>, Hugo José Alves<sup>2</sup>, Helena Toledo  
6 Scheid<sup>7</sup>, Débora Souza Faffe<sup>5</sup>, Rafael Mello Galliez<sup>7</sup>, Renata Eliane de Ávila<sup>8</sup>, Gustavo  
7 Gomes Resende<sup>9</sup>, Mauro Martins Teixeira<sup>10</sup>, COVID-19 UFRJ Workgroup, Orlando Costa  
8 Ferreira<sup>1</sup>, Terezinha Marta P. P. Castiñeiras<sup>7</sup>, Renan Pedra Souza<sup>2</sup>, Amilcar Tanuri<sup>1</sup>, Renato  
9 Santana Aguiar<sup>2</sup>, Shana Priscila Coutinho Barroso<sup>6</sup>, Cynthia Chester Cardoso<sup>1\*</sup>

10

11 <sup>1</sup>Laboratório de Virologia Molecular, Departamento de Genética, Instituto de Biologia,  
12 Universidade Federal do Rio de Janeiro, Rio de Janeiro, Postal Code: 21941-902, Brazil.

13 <sup>2</sup>Laboratório de Biologia Integrativa, Departamento de Genética, Ecologia e Evolução,  
14 Instituto de Ciências Biológicas, Universidade Federal de Minas Gerais, Belo Horizonte,  
15 Postal Code: 31270-901, Brazil.

16 <sup>3</sup>Instituto de Estudos do Mar Almirante Paulo Moreira, Marinha do Brasil, Arraial do Cabo,  
17 Postal Code: 28930-000,

18 <sup>4</sup>Instituto Nacional de Infectologia Evandro Chagas, Fiocruz, Rio de Janeiro, Postal Code:  
19 21040-360, Brazil.

20 <sup>5</sup>Instituto de Biofísica, Universidade Federal do Rio de Janeiro, Rio de Janeiro, Postal Code:  
21 21941-902, Brazil.

22 <sup>6</sup>Instituto de Pesquisas Biomédicas, Hospital Naval Marcílio Dias, Marinha do Brasil, Rio de  
23 Janeiro, Postal Code: 20725-090, Brazil.

24 <sup>7</sup>Faculdade de Medicina, Universidade Federal do Rio de Janeiro, Rio de Janeiro, Postal  
25 Code: 21941-902, Brazil.

26 <sup>8</sup>Hospital Eduardo de Menezes, Belo Horizonte, Postal Code: 30622-020, Brazil.

27 <sup>9</sup>Hospital das Clínicas, Universidade Federal de Minas Gerais (HC-UFMG/EBSERH), Belo  
28 Horizonte, Postal Code: 30130-100, Brazil.

29 <sup>10</sup>Departamento de Bioquímica e Imunologia, Instituto de Ciências Biológicas, Universidade  
30 Federal de Minas Gerais, Belo Horizonte, Postal Code: 31270-901, Brazil.

31 <sup>11</sup>Centro de Triagem e Diagnóstico COVID-19 UFRJ, Universidade Federal do Rio de  
32 Janeiro, Rio de Janeiro, Postal Code: 21941-902, Brazil.

33

34 **\*Corresponding Author**

35 Cynthia Chester Cardoso

36 Laboratório de Virologia Molecular, Departamento de Genética, Instituto de Biologia,  
37 Universidade Federal do Rio de Janeiro

38 Av. Carlos Chagas Filho 373, CCS, Bloco A, Sala 121 Ilha do Fundão, RJ, 21941-902, Brazil

39 Phone number: 55-21-25643353

40 email: [cynthiac@biologia.ufrj.br](mailto:cynthiac@biologia.ufrj.br)

41

42

43

44

45

46

47

48

49

50 **Supplementary Table 1: Association between chronic use of angiotensin receptor blockers and**  
 51 **COVID-19 respiratory distress.**

---

| <b>Total Cohort (N = 213)</b>                                        |            |              |                     |                               |
|----------------------------------------------------------------------|------------|--------------|---------------------|-------------------------------|
|                                                                      | Cases (%)  | Controls (%) | OR (95%CI)          | <i>p-value</i>                |
| Chronic Angiotensin<br>Receptor Blockers Use                         | 38 (17.84) | 175 (82.16)  | 6.94 (2.61 – 18.46) | <b>2.07 x 10<sup>-4</sup></b> |
| <b>Subset of Systemic Arterial Hypertension Individuals (N = 41)</b> |            |              |                     |                               |
|                                                                      | Cases (%)  | Controls (%) | OR (95%CI)          | <i>p-value</i>                |
| Chronic Angiotensin<br>Receptor Blockers Use                         | 19 (46.34) | 22 (53.66)   | 3.24 (0.65 – 19.09) | 0.1672                        |

---

52

53

54 **Supplementary Table 2: Stepwise regression analysis for selection of covariates**  
 55 **associated to COVID-19 respiratory distress.**

| Explanatory Variables                                            | Deviance      | AIC           |
|------------------------------------------------------------------|---------------|---------------|
| <b>Age + Systemic Arterial Hypertension + Diabetes + Obesity</b> | <b>122.52</b> | <b>130.51</b> |
| - Systemic Arterial Hypertension                                 | 121.57        | 131.57        |
| - Diabetes                                                       | 125.80        | 131.80        |
| + Any Comorbidity                                                | 122.03        | 132.03        |
| + Sex                                                            | 122.25        | 132.25        |
| - Obesity                                                        | 141.76        | 147.76        |
| - Age                                                            | 145.47        | 151.47        |

56 AIC = Akaike Information Criteria. Plus and minus symbols indicates whether the variable  
 57 was removed (-) or included (+) in the model.

58

59

60

61 **Supplementary Table 3: Stepwise regression analysis for variables associated with COVID-19**  
 62 **respiratory distress including *ACE2* and *TMPRSS2* expression levels.**

| Explanatory Variables                                                                         | Deviance     | AIC          |
|-----------------------------------------------------------------------------------------------|--------------|--------------|
| <b>Age + Systemic Arterial Hypertension + Diabetes + Obesity + <i>TMPRSS2</i>/<i>ACE2</i></b> | <b>85.11</b> | <b>97.11</b> |
| - Systemic Arterial Hypertension                                                              | 87.21        | 97.21        |
| + <i>ACE2</i>                                                                                 | 84.17        | 98.17        |
| + Any Comorbidity                                                                             | 84.83        | 98.83        |
| + Sex                                                                                         | 84.99        | 98.99        |
| - Diabetes                                                                                    | 89.19        | 99.19        |
| - <i>TMPRSS2</i> / <i>ACE2</i>                                                                | 91.85        | 101.85       |
| - Age                                                                                         | 96.84        | 106.84       |
| - Obesity                                                                                     | 99.07        | 109.07       |

63 AIC = Akaike Information Criteria. Plus and minus symbols indicates whether the variable was removed (-)  
 64 or included (+) in the model.

65

66

67 **Supplementary Table 4: Characteristics of patients included in comparisons**  
 68 **between nasopharyngeal swab and bronchoalveolar lavage samples.**

|                                | Group          |                 |
|--------------------------------|----------------|-----------------|
|                                | BAL (N=11)     | SWAB (N=34)     |
| <b>Age*</b>                    | 62 ( $\pm 7$ ) | 57 ( $\pm 14$ ) |
| <b>Sex</b>                     |                |                 |
| Male                           | 6 (54.5%)      | 19 (55.9%)      |
| Female                         | 5 (45.5%)      | 15 (44.1%)      |
| <b>Comorbidity</b>             |                |                 |
| Systemic Arterial Hypertension | 5 (55.5%)      | 20 (58.8%)      |
| Obesity                        | 3 (27.3%)      | 11 (32.3%)      |
| Diabetes                       | 5 (55.5%)      | 9 (26.5%)       |

69 \*data represented as mean  $\pm$  standard deviation. BAL = bronchoalveolar lavage  
 70 fluid; swab = nasopharyngeal swab samples.

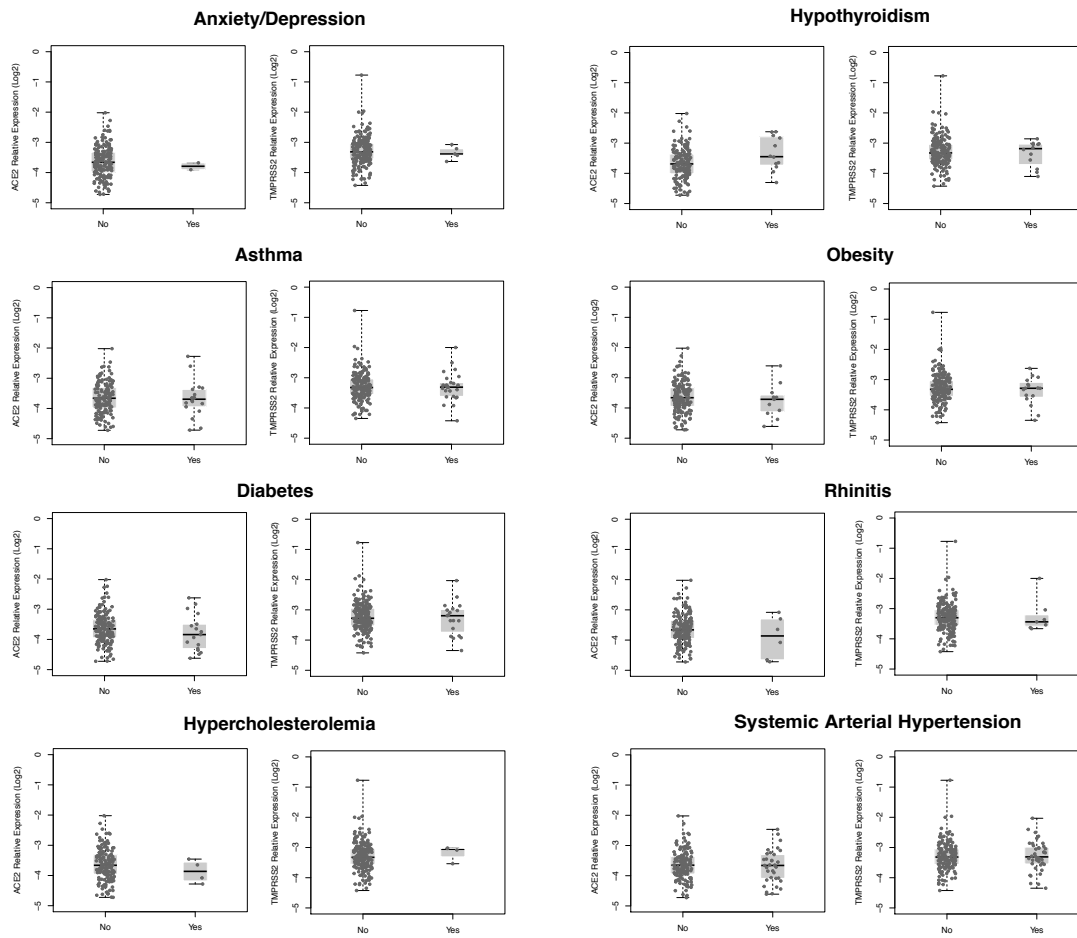

71

72 **Supplementary Figure 1: Nasopharyngeal expression of *ACE2* and *TMPRSS2* in**  
 73 **individuals with mild COVID-19 according to different chronic diseases.** Expression  
 74 levels were assessed by RT-qPCR and are shown in log-scale (base 2) taking *B2M* expression  
 75 as reference. Boxes represent mean and interquartile range, and whiskers stand for upper and  
 76 lower limits. Comparisons between groups were made by linear regression models.

77

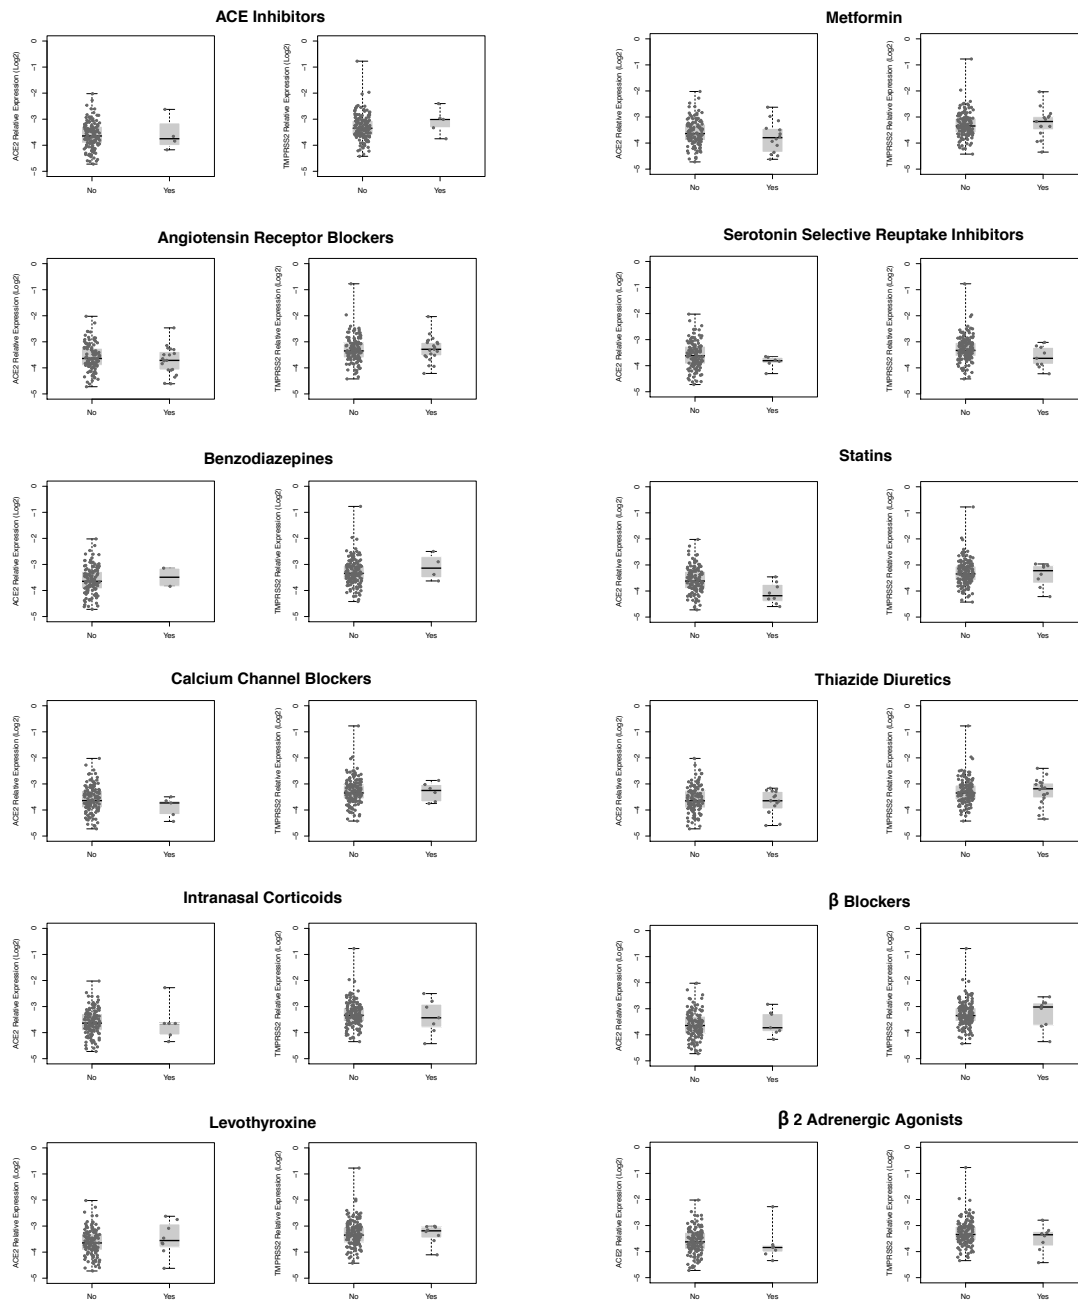

78

79 **Supplementary Figure 2: Nasopharyngeal expression of *ACE2* and *TMPRSS2* in**  
 80 **individuals with mild COVID-19 according to chronic therapy use.** Expression levels  
 81 were assessed by RT-qPCR plotted in log-scale (base 2) relative to *B2M* expression. Boxes  
 82 represent mean and interquartile range, and whiskers stand for upper and lower limits.  
 83 Comparisons between groups were made by linear regression models.

84
